# Supplementary material for: On the understanding of energetic disorder, charge recombination and voltage losses in all-polymer solar cells
Source: Royal Society of Chemistry journal article supplement (doi:10.1039/c8tc02689k), 2018-01-01
Supplement: c8tc02689k1.pdf [file c8tc02689k1.pdf]

## Supporting Information

### On the understandings of the energetic disorder, charge recombination and voltage Losses in all-polymer solar cells

Ao Yin, Dongyang Zhang, Ken Cheung, Zhiqiang Fu,\* Lei Ying,\* Fei Huang, Huiqiong Zhou, Yuan Zhang\*

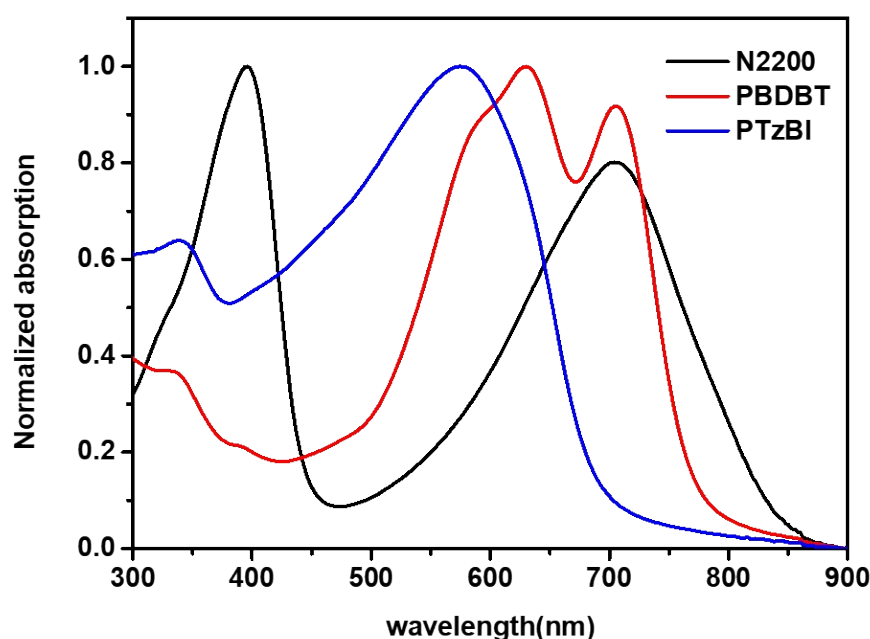

**Fig. S1.** Normalized absorption of neat PTzBI, PBDB-T and N2200 films.

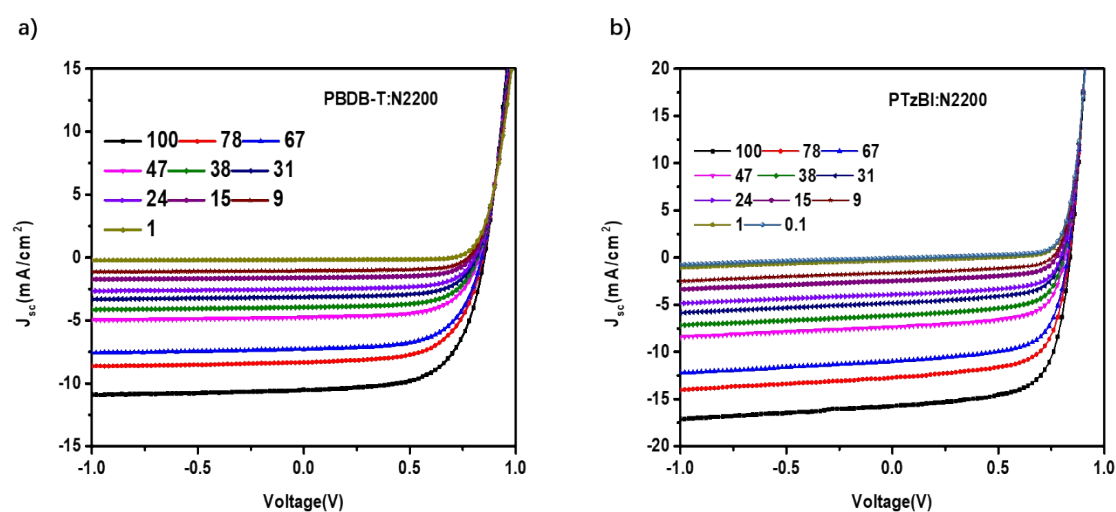

**Fig. S2.** Irradiation dependent  $J$ - $V$  characteristics of all-PSCs based on active layers of (a) PBDB-T:N2200 and (b) PTzBI:N2200.

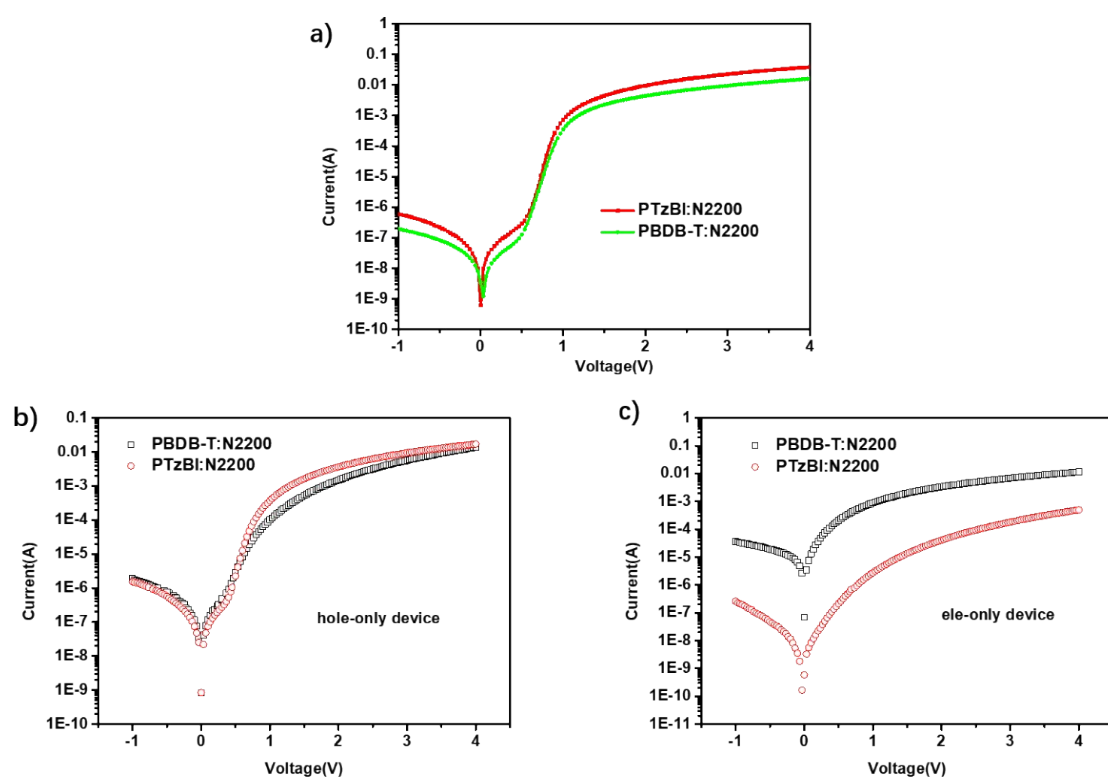

**Fig. S3.** Dark  $J$ - $V$  characteristics of (a) double-carrier, (b) hole-only, and (c) electron-only devices based on active layers of PTzBI:N2200 and PBDB-T:N2200 blend films.

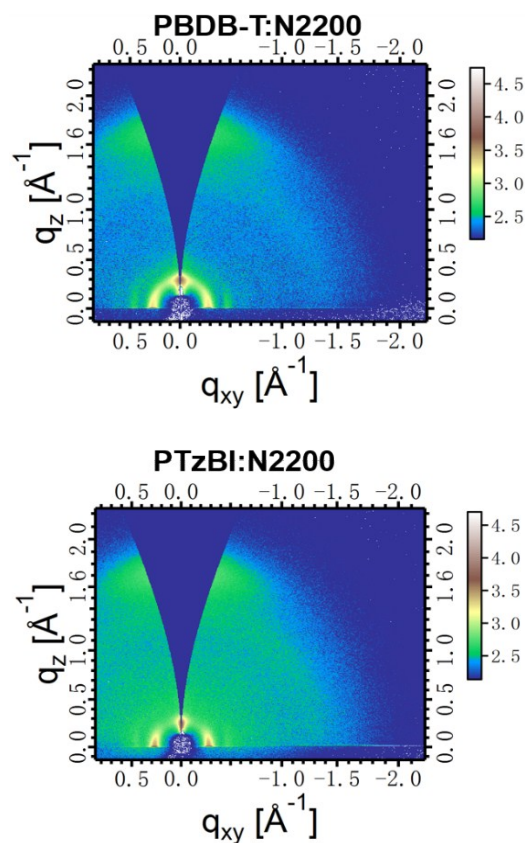

**Fig. S4.** 2D GIWAXS patterns of PBDBT:N2200 and PTzBI:N2200 blend films

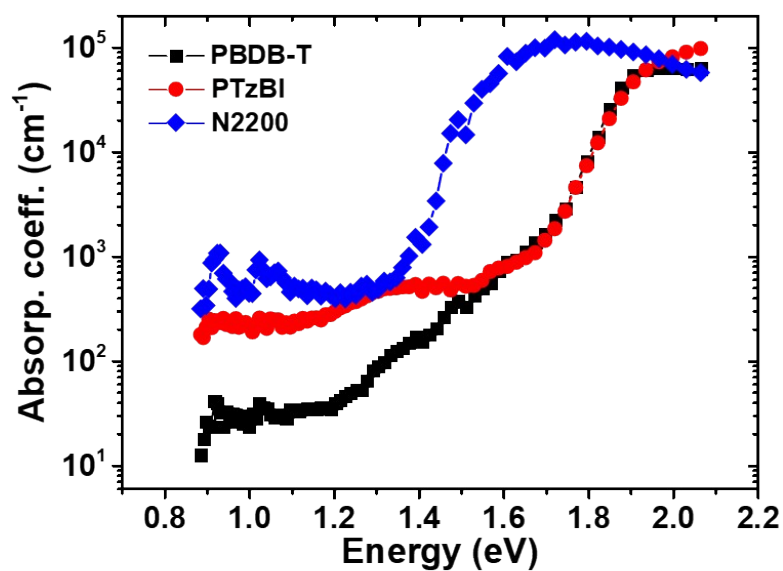

**Fig. S5.** Photothermal deflection spectroscopy of thin films based on neat donor and acceptor films.

**Table S1.** Mobilities of holes, electrons and double carriers (solar cell) in the compared all-polymer blends.

| BHJ          | $\mu_e$ (cm <sup>2</sup> ·V <sup>-1</sup> ·S <sup>-1</sup> ) | $\mu_h$ (cm <sup>2</sup> ·V <sup>-1</sup> ·S <sup>-1</sup> ) | $\mu_{solar}$ (cm <sup>2</sup> ·V <sup>-1</sup> ·S <sup>-1</sup> ) |
|--------------|--------------------------------------------------------------|--------------------------------------------------------------|--------------------------------------------------------------------|
| PBDB-T:N2200 | $0.73 \times 10^{-3}$                                        | $0.12 \times 10^{-3}$                                        | $1.38 \times 10^{-3}$                                              |
| PTzBI:N2200  | $4.31 \times 10^{-5}$                                        | $1.15 \times 10^{-3}$                                        | $1.55 \times 10^{-3}$                                              |
